# Supplementary material
Source: Springer Nature journal article supplement (https://www.springermedizin.de/resource/supplementary/13002_2014_425_MOESM3_ESM.pdf/9626890)

Gavião

*Caracara plancus*

Gavião-carcará

*Elanus leucurus*

Gavião-peneira

*Herpethotes cachinnans*

Acauã

*Rupornis magnirostris*

{ Gavião-pega-pinto  
Gavião-pedrez

*Geranoaetus albicaudatus*

Gavião-rapina

*Buteo brachyurus*

*Rupornis magnirostris*

{ Gavião-pega-pinto  
Gavião-pedrez

*Geranospiza caerulescens*

Gavião-pé-de-morro

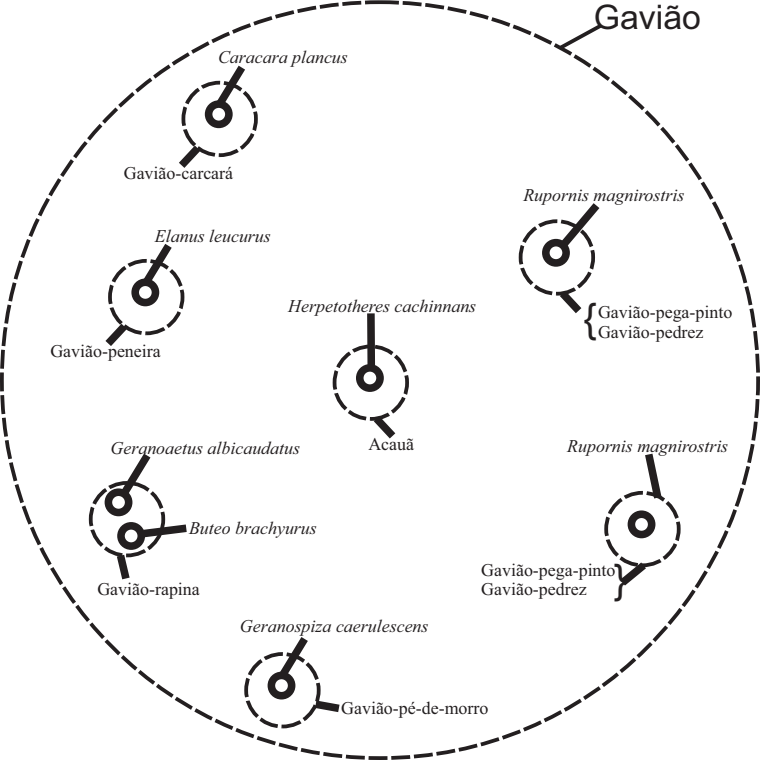

Supplement: MOESM3 [file 9626890]
